# Supplementary material for: Knockout of Foxp2 disrupts vocal development in mice
Source: PubMed Central journal article supplement (PMC4793191; doi:10.1038/srep23305), 2016-03-16
Supplement: srep23305-s1.pdf [file srep23305-s1.pdf]

1  
2  
3  
4  
5  
6  
7  
8  
9  
10  
11

**Knockout of *Foxp2* disrupts vocal development in mice.**

**Authors:** Gregg A. Castellucci<sup>1,2,3</sup>, Matthew J. McGinley<sup>1</sup>, David A. McCormick<sup>1\*</sup>

<sup>1</sup>Yale School of Medicine, Department of Neuroscience, New Haven, 06519, USA

<sup>2</sup>Yale University, Department of Linguistics, New Haven, 06520, USA

<sup>3</sup>Haskins Laboratories, New Haven, 06511, USA

\*Correspondence and requests for materials should be addressed to D.M.

([david.mccormick@yale.edu](mailto:david.mccormick@yale.edu)).

**Supplementary Information - Supplemental Figures and Figure Legends**

12 **Supplementary Figure S1** Syllable detection parameters. From 6 typical recordings of mouse  
13 song (3 WT, 3 Foxp2+/-): **(a)** histogram of all instantaneous full-scale decibel (dBFS)  
14 measurements of acoustic power, **(b)** histogram of spectral flatness values measured in 1 ms bins  
15 from the same six recordings with the maximum spectral flatness value of 0.6 used in this study  
16 indicated, **(c)** spectral flatness plotted against the average dBFS values in 1 ms bins, and **(d)**  
17 histogram of all silent periods at least 10 ms in duration; the minimum ISI value of 40 ms used in  
18 this study is indicated.

19

20 **Supplementary Figure S2** Vocalization Production is Dependent on Socialization History.  
21 Syllable rate (syllables per minute) in each recording session for WT mice **(a)** socialized 3 times  
22 a week from P25 to P95 (n = 8 mice), **(b)** socialized 2 times a week from P25 to P95 (n = 3  
23 mice), **(c)** socialized 3 times a week from P38 to P95 (n = 5 mice), and **(d)** socialized 3 times a  
24 week from P60 to P95. Each line represents a different mouse.

25

26 **Supplementary Figure S3** Gaussian Fits of WT Syllable Duration Distributions. **(a)** Average  
27 Gaussian centers from the fit of two Gaussians to each WT mouse's syllable duration distribution  
28 at each age. **(b)** Average fit weights across WT mice for the Gaussians corresponding to longer  
29 duration syllables from the fit of two Gaussians described in (a). In (a) and (b), data are  
30 presented as means +/- 1 SEM. All significant differences between age groups are indicated (\*, p  
31 < 0.05; \*\* p < 0.005; \*\*\* p < 0.0005; \*\*\*\*, p < 0.0001; two-way repeated measures ANOVA  
32 with Sidak's Correction for multiple comparisons. Additional statistical details are presented in  
33 Supplementary Table S1.

34

35 **Supplementary Table S1** ANOVA Statistics.

36

37 **Supplementary Table S2** Kruskal-Wallis Statistics.

38

39 **Supplementary Table S3** Welch's T-Test Statistics.

40

41

# Syllable Detection Parameters

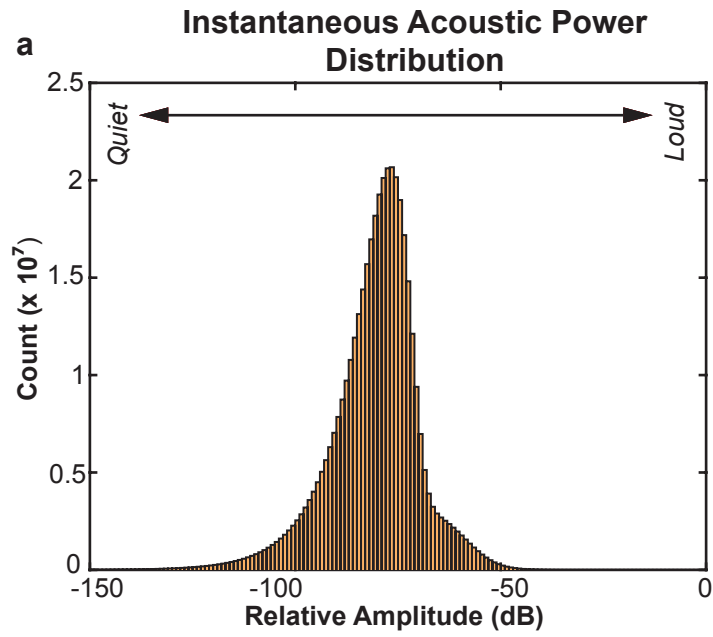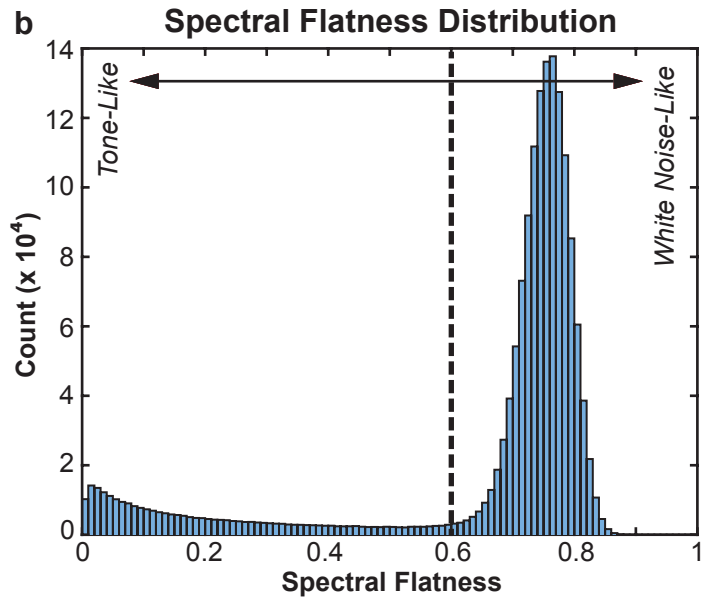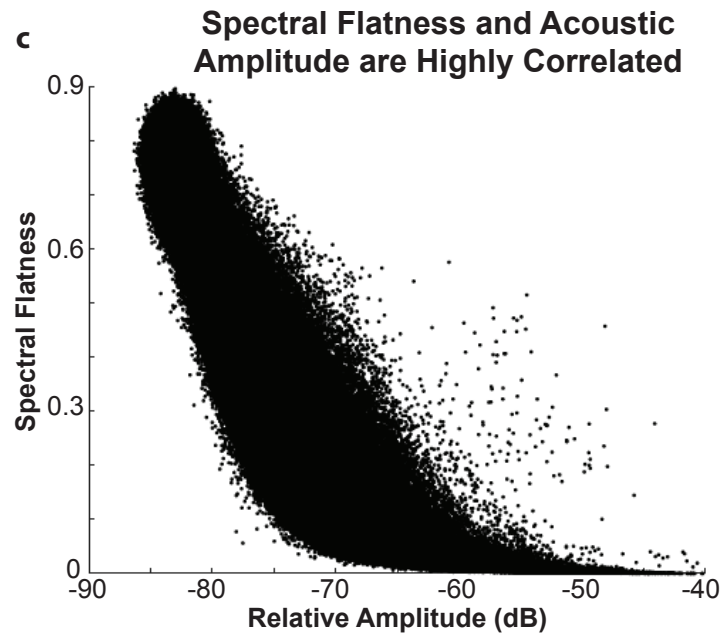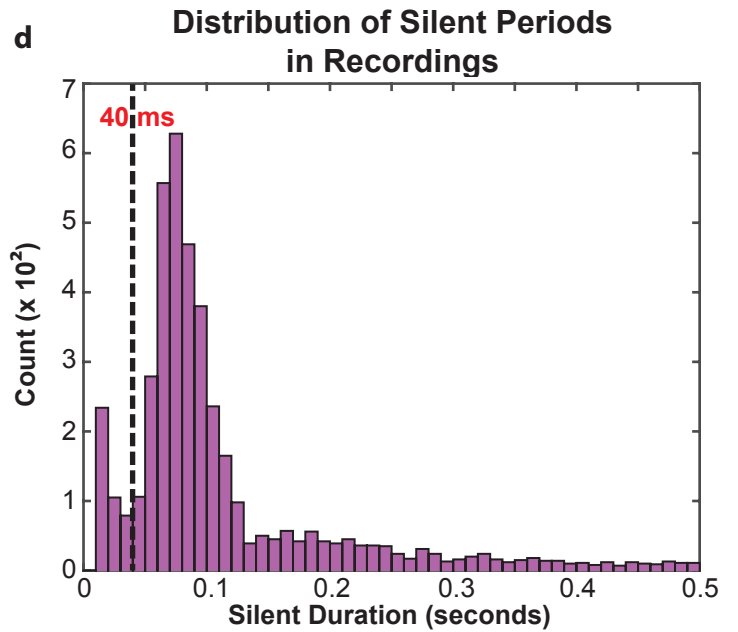

# Vocalization Production is Dependent on Socialization History

**a** Socialization from P25, 3x weekly

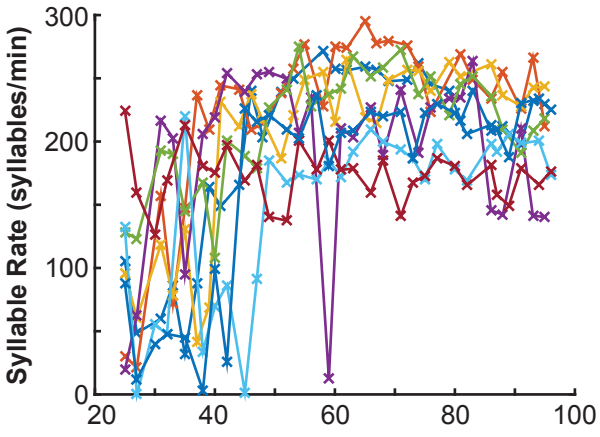

**b** Socialization from P25, 2x weekly

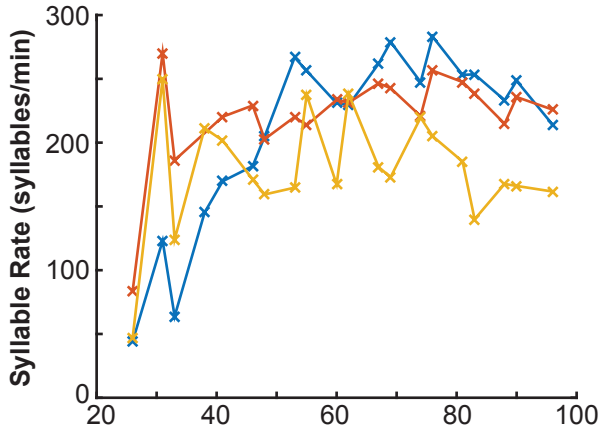

**c** Socialization from P38, 3x weekly

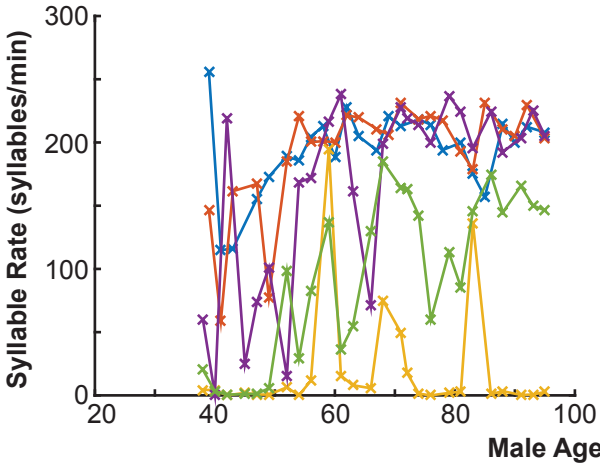

**d** Socialization from P60, 3x weekly

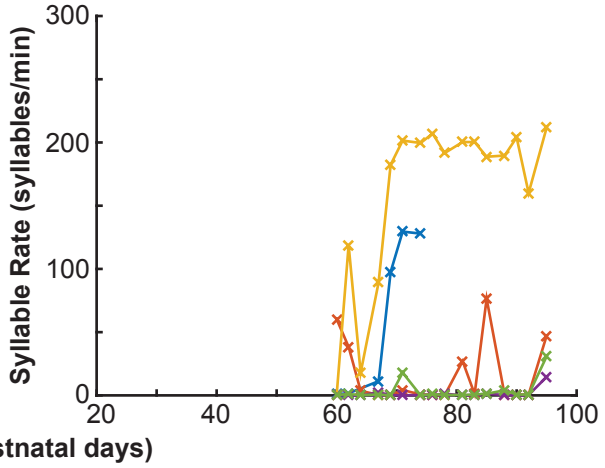

Male Age (postnatal days)

# Gaussian Fits of WT Syllable Duration Distributions

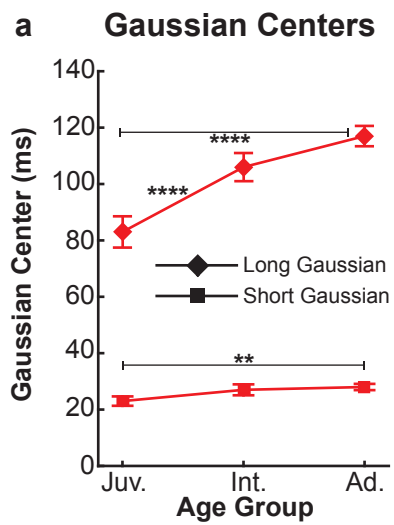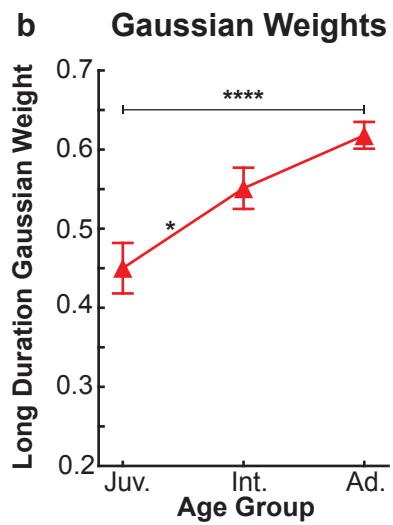

| ANOVA Statistics*   |                                                        |                     |             |                     |             |          |                 |
|---------------------|--------------------------------------------------------|---------------------|-------------|---------------------|-------------|----------|-----------------|
| Figure              | Test Used                                              | Source of Variation | P-Value     | F-Value             | Sample Size |          |                 |
|                     |                                                        |                     |             |                     | WT          | Foxp2+/- | Foxp2+/ (SR>90) |
| 1d                  | 2-way repeated measures ANOVA; Sidak's Correction      | Interaction         | 0.6807      | F (2, 46) = 0.3879  | 14 mice     | 11 mice  | N/A             |
|                     |                                                        | Genotype            | <0.0001**** | F (1, 23) = 28.94   |             |          |                 |
|                     |                                                        | Age                 | <0.0001**** | F (2, 46) = 37.06   |             |          |                 |
|                     |                                                        | Subjects (matching) | 0.003***    | F (23, 46) = 3.248  |             |          |                 |
|                     | 1-way ANOVA; Tukey's Correction (between Adult groups) | Between Groups      | 0.0018****  | F (2, 28) = 7.948   |             |          | 6 mice          |
| 2e                  | 2-way repeated measures ANOVA; Sidak's Correction      | Interaction         | 0.071       | F (2, 44) = 2.810   | 14 mice     | 11 mice  | N/A             |
|                     |                                                        | Genotype            | 0.081       | F (1, 22) = 3.345   |             |          |                 |
|                     |                                                        | Age                 | <0.0001**** | F (2, 44) = 22.78   |             |          |                 |
|                     |                                                        | Subjects (matching) | <0.0001**** | F (22, 44) = 4.293  |             |          |                 |
|                     | 1-way ANOVA; Tukey's Correction (between Adult groups) | Between Groups      | 0.6523      | F (2, 27) = 0.4341  |             |          | 6 mice          |
| 2f                  | 2-way repeated measures ANOVA; Sidak's Correction      | Interaction         | 0.0004***   | F (2, 44) = 9.290   | 13 mice     | 11 mice  | N/A             |
|                     |                                                        | Genotype            | <0.0001**** | F (1, 22) = 27.29   |             |          |                 |
|                     |                                                        | Age                 | 0.063       | F (2, 44) = 2.946   |             |          |                 |
|                     |                                                        | Subjects (matching) | <0.0001**** | F (22, 44) = 6.460  |             |          |                 |
|                     | 1-way ANOVA; Tukey's Correction (between Adult groups) | Between Groups      | <0.0001**** | F (2, 27) = 36.25   |             |          | 6 mice          |
| S3b, Short Gaussian | 2-way repeated measures ANOVA; Sidak's Correction      | Interaction         | 0.071       | F (2, 44) = 2.810   | 13 mice     | 11 mice  | N/A             |
|                     |                                                        | Genotype            | 0.081       | F (1, 22) = 3.345   |             |          |                 |
|                     |                                                        | Age                 | <0.0001**** | F (2, 44) = 22.78   |             |          |                 |
|                     |                                                        | Subjects (matching) | <0.0001**** | F (22, 44) = 4.293  |             |          |                 |
|                     | 1-way ANOVA; Tukey's Correction (between Adult groups) | Between Groups      | 0.6523      | F (2, 27) = 0.4341  |             |          | 6 mice          |
| S3b, Long Gaussian  | 2-way repeated measures ANOVA; Sidak's Correction      | Interaction         | 0.1414      | F (2, 44) = 2.045   | 13 mice     | 11 mice  | N/A             |
|                     |                                                        | Genotype            | <0.0001**** | F (1, 22) = 44.81   |             |          |                 |
|                     |                                                        | Age                 | <0.0001**** | F (2, 44) = 30.11   |             |          |                 |
|                     |                                                        | Subjects (matching) | 0.0006**    | F (22, 44) = 3.156  |             |          |                 |
|                     | 1-way ANOVA; Tukey's Correction (between Adult groups) | Between Groups      | <0.0001**** | F (2, 27) = 34.52   |             |          | 6 mice          |
| S3c                 | 2-way repeated measures ANOVA; Sidak's Correction      | Interaction         | 0.1269      | F (2, 44) = 2.164   | 13 mice     | 11 mice  | N/A             |
|                     |                                                        | Genotype            | 0.0002***   | F (1, 22) = 19.88   |             |          |                 |
|                     |                                                        | Age                 | 0.0001***   | F (2, 44) = 10.98   |             |          |                 |
|                     |                                                        | Subjects (matching) | 0.0002***   | F (22, 44) = 3.503  |             |          |                 |
|                     | 1-way ANOVA; Tukey's Correction (between Adult groups) | Between Groups      | 0.0002***   | F (2, 27) = 11.54   |             |          | 6 mice          |
| 3f                  | 2-way repeated measures ANOVA; Sidak's Correction      | Interaction         | 0.0149*     | F (2, 46) = 4.615   | 14 mice     | 11 mice  | N/A             |
|                     |                                                        | Genotype            | <0.0001**** | F (1, 23) = 34.29   |             |          |                 |
|                     |                                                        | Age                 | 0.0071**    | F (2, 46) = 5.512   |             |          |                 |
|                     |                                                        | Subjects (matching) | 0.0031**    | F (23, 46) = 2.581  |             |          |                 |
|                     | 1-way ANOVA; Tukey's Correction (between Adult groups) | Between Groups      | <0.0001**** | F (2, 28) = 26.48   |             |          | 6 mice          |
| 3g                  | 2-way repeated measures ANOVA; Sidak's Correction      | Interaction         | 0.1725      | F (2, 46) = 1.826   | 14 mice     | 11 mice  | N/A             |
|                     |                                                        | Genotype            | <0.0001**** | F (1, 23) = 64.50   |             |          |                 |
|                     |                                                        | Age                 | 0.0003***   | F (2, 46) = 9.939   |             |          |                 |
|                     |                                                        | Subjects (matching) | 0.0329*     | F (23, 46) = 1.890  |             |          |                 |
|                     | 1-way ANOVA; Tukey's Correction (between Adult groups) | Between Groups      | <0.0001**** | F (2, 28) = 23.82   |             |          | 6 mice          |
| 3h                  | 2-way repeated measures ANOVA; Sidak's Correction      | Interaction         | 0.9507      | F (2, 46) = 0.05062 | 14 mice     | 11 mice  | N/A             |
|                     |                                                        | Genotype            | 0.0003***   | F (1, 23) = 17.80   |             |          |                 |
|                     |                                                        | Age                 | 0.0005***   | F (2, 46) = 8.905   |             |          |                 |
|                     |                                                        | Subjects (matching) | 0.0017**    | F (23, 46) = 2.760  |             |          |                 |
|                     | 1-way ANOVA; Tukey's Correction (between Adult groups) | Between Groups      | 0.0041**    | F (2, 28) = 6.732   |             |          | 6 mice          |
| 4b,4c               | 1-way ANOVA; Tukey's Correction (between Adult groups) | Between Groups      | <0.0001**** | F (23, 216) = 116.2 | 14 mice     | N/A      | 6 mice          |
| 4d,4e               | 1-way ANOVA; Tukey's Correction (between Adult groups) | Between Groups      | <0.0001**** | F (23, 216) = 62.09 | 14 mice     | N/A      | 6 mice          |

\*P-values for individual multiple comparisons are reported in figures.

| <b>Kruskal-Wallis Statistics*</b> |                                         |                            |                |                                 |                    |                     |              |                 |                     |              |                        |
|-----------------------------------|-----------------------------------------|----------------------------|----------------|---------------------------------|--------------------|---------------------|--------------|-----------------|---------------------|--------------|------------------------|
| <b>Figure</b>                     | <b>Test Used</b>                        | <b>Source of Variation</b> | <b>P-Value</b> | <b>Kruskal-Wallis Statistic</b> | <b>Sample Size</b> |                     |              |                 |                     |              |                        |
|                                   |                                         |                            |                |                                 | <u>WT</u>          |                     |              | Foxp2+/-        |                     |              |                        |
|                                   |                                         |                            |                |                                 | <i>Juvenile</i>    | <i>Intermediate</i> | <i>Adult</i> | <i>Juvenile</i> | <i>Intermediate</i> | <i>Adult</i> | <i>Adult, SR&gt;90</i> |
| Figure 3c                         | 1-way Kruskal-Wallis; Dunn's Correction | Between Groups             | 0.8244         | 2.874                           | 2301 groups        | 2240 groups         | 6160 groups  | 594 groups      | 600 groups          | 608 groups   | 4542 groups            |
| Figure 3d                         | 1-way Kruskal-Wallis; Dunn's Correction | Between Groups             | <0.0001****    | -301.1                          | 1287 bouts         | 1498 bouts          | 3836 bouts   | 416 bouts       | 1179 bouts          | 1155 bouts   | 2892 bouts             |
| Figure 3e                         | 1-way Kruskal-Wallis; Dunn's Correction | Between Groups             | <0.0001****    | -1110                           | 1287 bouts         | 1498 bouts          | 3836 bouts   | 416 bouts       | 1179 bouts          | 1155 bouts   | 2892 bouts             |

\*P-values for individual multiple comparisons are reported in figures.



| Welch's T-Tests |                                                                 |                    |                    |                                                      |               |             |          |
|-----------------|-----------------------------------------------------------------|--------------------|--------------------|------------------------------------------------------|---------------|-------------|----------|
| Figure          | Comparison                                                      | Two-Tailed P-Value | Welch's Statistics | Adjusted Significance Threshold<br>(Sidak Corrected) |               | Sample Size |          |
|                 |                                                                 |                    |                    |                                                      |               | WT          | Foxp2+/- |
| Table 1         | St. Dev. of within-Syllable Dominant Frequency                  | <0.0001****        | t=12.07 df=21.65   | 0.01                                                 | 5 Comparisons | 14 mice     | N/A      |
|                 | St. Dev. of within-Syllable Relative Amplitude                  | <0.0001****        | t=5.197 df=24.55   | 0.01                                                 | 5 Comparisons | 14 mice     | N/A      |
|                 | Number of Pitch Jumps                                           | <0.0001****        | t=13.80 df=13.70   | 0.01                                                 | 5 Comparisons | 14 mice     | N/A      |
|                 | Dominant Frequency                                              | <0.0001****        | t=5.971 df=20.53   | 0.01                                                 | 5 Comparisons | 14 mice     | N/A      |
| Table 2         | St. Dev. of within-Syllable Dominant Frequency, Short Syllables | 0.1906             | t=1.438 df=7.541   | 0.0064                                               | 8 Comparisons | 14 mice     | 6 mice   |
|                 | St. Dev. of within-Syllable Dominant Frequency, Long Syllables  | 0.1459             | t=1.628 df=7.265   | 0.0064                                               | 8 Comparisons | 14 mice     | 6 mice   |
|                 | St. Dev. of within-syllable Relative Amplitude, Short Syllables | 0.6015             | t=0.5392 df=10.02  | 0.0064                                               | 8 Comparisons | 14 mice     | 6 mice   |
|                 | St. Dev. of within-syllable Relative Amplitude, Long Syllables  | 0.8413             | t=0.2057 df=9.770  | 0.0064                                               | 8 Comparisons | 14 mice     | 6 mice   |
|                 | Number of Pitch Jumps, Short Syllables                          | 0.8659             | t=0.1763 df=5.956  | 0.0064                                               | 8 Comparisons | 14 mice     | 6 mice   |
|                 | Number of Pitch Jumps, Long Syllables                           | 0.0091             | t=2.975 df=15.61   | 0.0064                                               | 8 Comparisons | 14 mice     | 6 mice   |
|                 | Dominant Frequency, Short Syllables                             | 0.9756             | t=0.03133 df=10.27 | 0.0064                                               | 8 Comparisons | 14 mice     | 6 mice   |
|                 | Dominant Frequency, Long Syllables                              | 0.6011             | t=0.5434 df=8.305  | 0.0064                                               | 8 Comparisons | 14 mice     | 6 mice   |
